# Supplementary material for: Insights into the impact of N- and O-methylation on aqueous solubility and lipophilicity using matched molecular pair analysis
Source: Royal Society of Chemistry journal article supplement (doi:10.1039/c5md00309a), 2015-01-01

## Statistics for CLND solubility changes upon N- and O-methylation

| Methylation type               | Class       | SOL DIFF<br>Count | SOL DIFF<br>Avg | SOL DIFF<br>StdDev | SOL DIFF<br>StdErr | SOL DIFF<br>Median | SOL DIFF<br>Min | SOL DIFF<br>Max | SOL DIFF<br>L95 | SOL DIFF<br>U95 | SOL %PAIRS<br>> 0 | Shapiro-<br>Wilk test | Paired t test | Signed-rank<br>test |
|--------------------------------|-------------|-------------------|-----------------|--------------------|--------------------|--------------------|-----------------|-----------------|-----------------|-----------------|-------------------|-----------------------|---------------|---------------------|
| Alk-CONH2                      | Amide       | 140               | 0.11            | 0.42               | 0.04               | 0.01               | -1.2            | 1.18            | 0.04            | 0.18            | 52.1%             | <0.0001*              | 0.0026*       | NA                  |
| Alk-CONH-Alk                   | Amide       | 426               | 0.06            | 0.48               | 0.02               | 0.02               | -2.52           | 2.65            | 0.01            | 0.1             | 53.1%             | <0.0001*              | 0.0119*       | NA                  |
| Alk-CONH-Ar                    | Amide       | 324               | 0.11            | 0.55               | 0.03               | 0.02               | -2.57           | 2.49            | 0.05            | 0.17            | 54.6%             | <0.0001*              | 0.0003*       | NA                  |
| Ar-CONH2                       | Amide       | 410               | 0.07            | 0.51               | 0.03               | 0.02               | -2.62           | 2.48            | 0.02            | 0.12            | 52.7%             | <0.0001*              | 0.0082*       | NA                  |
| Ar-CONH-Alk                    | Amide       | 517               | 0.25            | 0.58               | 0.03               | 0.08               | -2.49           | 2.62            | 0.2             | 0.3             | 64.8%             | <0.0001*              | <0.0001*      | NA                  |
| Ar-CONH-Ar                     | Amide       | 105               | 0.39            | 0.86               | 0.08               | 0.09               | -1.71           | 2.64            | 0.22            | 0.55            | 59.0%             | <0.0001*              | <0.0001*      | NA                  |
| Alk-NH-Alk                     | Amine       | 1121              | -0.01           | 0.48               | 0.01               | 0.02               | -2.62           | 3.02            | -0.04           | 0.02            | 53.2%             | <0.0001*              | 0.3869        | NA                  |
| Ar-NH-Alk                      | Amine       | 604               | -0.04           | 0.53               | 0.02               | -0.03              | -2.57           | 2.56            | -0.08           | 0               | 41.1%             | <0.0001*              | 0.0657        | NA                  |
| Ar-NH-Ar                       | Amine       | 181               | 0.14            | 0.59               | 0.04               | 0.06               | -1.62           | 2.38            | 0.05            | 0.22            | 56.4%             | 0.0198*               | 0.0026*       | NA                  |
| Arom-NH                        | Amine       | 857               | 0.04            | 0.58               | 0.02               | 0.04               | -2.49           | 2.12            | 0               | 0.08            | 54.7%             | <0.0001*              | 0.0332*       | NA                  |
| R-OCNH-R                       | Carbamate   | 50                | -0.09           | 0.4                | 0.06               | -0.02              | -1.3            | 0.79            | -0.2            | 0.02            | 40.0%             | <0.0001*              | 0.1048        | NA                  |
| Alk-COOH                       | Acid        | 349               | -0.65           | 0.79               | 0.04               | -0.41              | -2.75           | 1.53            | -0.72           | -0.56           | 19.5%             | <0.0001*              | <0.0001*      | NA                  |
| Alk-OH                         | Alcohol     | 610               | -0.19           | 0.49               | 0.02               | -0.07              | -2.4            | 1.42            | -0.23           | -0.15           | 33.8%             | <0.0001*              | <0.0001*      | NA                  |
| Ar-COOH                        | Acid        | 505               | -0.94           | 0.86               | 0.04               | -0.95              | -2.83           | 2.65            | -1              | -0.85           | 13.5%             | <0.0001*              | <0.0001*      | NA                  |
| Ar-OH                          | Phenol      | 964               | -0.21           | 0.65               | 0.02               | -0.07              | -3.07           | 2.09            | -0.25           | -0.17           | 39.1%             | <0.0001*              | <0.0001*      | NA                  |
| Alk-SO2-NH2                    | Sulfonamide | 9                 | -0.09           | 0.35               | 0.12               | 0.05               | -0.65           | 0.32            | -0.32           | 0.14            | 55.6%             | 0.2146                | NA            | 0.7344              |
| Alk-SO2-NH-Alk                 | Sulfonamide | 23                | -0.33           | 0.43               | 0.09               | -0.16              | -1.26           | 0.31            | -0.51           | -0.16           | 8.7%              | 0.0177*               | 0.0011*       | NA                  |
| Alk-SO2-NH-Ar                  | Sulfonamide | 37                | -0.22           | 0.48               | 0.08               | -0.07              | -1.61           | 0.68            | -0.38           | -0.07           | 29.7%             | 0.0009*               | 0.0076*       | NA                  |
| Ar-SO2-NH2                     | Sulfonamide | 65                | -0.1            | 0.54               | 0.07               | -0.03              | -1.5            | 1.67            | -0.24           | 0.03            | 43.1%             | 0.0006*               | 0.101         | NA                  |
| Ar-SO2-NH-Alk                  | Sulfonamide | 156               | -0.23           | 0.53               | 0.04               | -0.15              | -1.84           | 1.28            | -0.31           | -0.14           | 32.7%             | 0.0331*               | <0.0001*      | NA                  |
| Ar-SO2-NH-Ar                   | Sulfonamide | 60                | -0.42           | 0.65               | 0.08               | -0.31              | -2.23           | 0.9             | -0.58           | -0.25           | 21.7%             | 0.0003*               | <0.0001*      | NA                  |
| Alk-NH-C(=O)-NH-Alk            | Urea        | 18                | 0.36            | 0.46               | 0.11               | 0.15               | -0.59           | 1.15            | 0.08            | 0.51            | 72.2%             | 0.094                 | NA            | 0.0030*             |
| Alk-NR-C(=O)-NH-Alk            | Urea        | 57                | -0.02           | 0.45               | 0.06               | -0.03              | -1.3            | 1.83            | -0.11           | 0.11            | 33.3%             | <0.0001*              | 0.7608        | NA                  |
| Ar-NH-C(=O)-NH-Ar              | Urea        | 8                 | 0.61            | 0.4                | 0.14               | 0.49               | 0.2             | 1.26            | 0.33            | 0.88            | 100.0%            | 0.3033                | NA            | 0.0078*             |
| Ar-NR-C(=O)-NH-Ar              | Urea        | 5                 | 0.94            | 0.99               | 0.44               | 0.66               | 0.14            | 2.63            | 0.07            | 1.8             | 100.0%            | 0.0976                | NA            | 0.0625              |
| [N;!H0]!@[c,CX3]@[c,CX3]!@C=O  | Amide IMHB  | 12                | 0.36            | 1.02               | 0.3                | 0.46               | -1.76           | 2.21            | -0.22           | 0.94            | 66.7%             | 0.8235                | NA            | 0.2036              |
| [N;!H0]!@[c,CX3]!@[c,CX3]!@C=O | Amide IMHB  | 5                 | 1.44            | 1.32               | 0.59               | 1.89               | -0.01           | 2.63            | 0.29            | 2.6             | 80.0%             | 0.0891                | NA            | 0.125               |
| [N;!H0]!@C!@c[n;X2]            | Amide IMHB  | 103               | 0.42            | 0.72               | 0.07               | 0.27               | -1.33           | 2.6             | 0.3             | 0.58            | 70.9%             | 0.0013*               | <0.0001*      | NA                  |
| OccC(=O)[NH1][c,C]             | Amide IMHB  | 44                | 0.22            | 0.6                | 0.09               | 0.02               | -0.9            | 2.64            | 0.05            | 0.4             | 61.4%             | <0.0001*              | 0.0177*       | NA                  |
| [NH1]!@[c;X3]!@ccF             | Amide IMHB  | 10                | 0.04            | 0.13               | 0.04               | -0.01              | -0.06           | 0.38            | -0.04           | 0.13            | 50.0%             | 0.0032*               | 0.3191        | NA                  |
| [c;C;X3]!@[NH1]!@ccF           | Amide IMHB  | 2                 | -0.1            | 0.26               | 0.19               | -0.1               | -0.28           | 0.09            | -0.46           | 0.27            | 50.0%             | 1                     | NA            | 1                   |
| No IMHBs                       | Amide IMHB  | 674               | 0.27            | 0.56               | 0.02               | 0.09               | -1.45           | 2.51            | 0.22            | 0.31            | 65.0%             | <0.0001*              | <0.0001*      | NA                  |
| Cyclic amides                  | Amide       | 169               | -0.04           | 0.46               | 0.04               | -0.03              | -2.57           | 1.81            | -0.11           | 0.03            | 43.2%             | <0.0001*              | 0.2915        | NA                  |
| Acyclic amides                 | Amide       | 778               | 0.28            | 0.62               | 0.02               | 0.08               | -2.49           | 2.64            | 0.23            | 0.32            | 64.5%             | <0.0001*              | <0.0001*      | NA                  |

# Statistics for chromatographic log D changes upon N- and O-methylation

| Methylation type                     | Class       | LOGD DIFF<br>Count | LOGD DIFF<br>Avg | LOGD DIFF<br>StdDev | LOGD DIFF<br>StdErr | LOGD DIFF<br>Median | LOGD DIFF<br>Min | LOGD DIFF<br>Max | LOGD DIFF<br>L95 | LOGD DIFF<br>U95 | LOGD<br>%PAIRS > 0 | Shapiro-<br>Wilk test | Paired t test | Signed-rank<br>test |
|--------------------------------------|-------------|--------------------|------------------|---------------------|---------------------|---------------------|------------------|------------------|------------------|------------------|--------------------|-----------------------|---------------|---------------------|
| Alk-CONH2                            | Amide       | 132                | 0.35             | 0.4                 | 0.03                | 0.32                | -1.98            | 2.22             | 0.29             | 0.42             | 95.5%              | <0.0001*              | <0.0001*      | NA                  |
| Alk-CONH-Alk                         | Amide       | 386                | 0.54             | 0.51                | 0.03                | 0.53                | -1.71            | 6.45             | 0.48             | 0.59             | 94.0%              | <0.0001*              | <0.0001*      | NA                  |
| Alk-CONH-Ar                          | Amide       | 304                | 0.45             | 0.6                 | 0.03                | 0.59                | -4.57            | 1.77             | 0.38             | 0.52             | 86.5%              | <0.0001*              | <0.0001*      | NA                  |
| Ar-CONH2                             | Amide       | 387                | 0.45             | 0.39                | 0.02                | 0.41                | -1.75            | 4.67             | 0.41             | 0.49             | 97.9%              | <0.0001*              | <0.0001*      | NA                  |
| Ar-CONH-Alk                          | Amide       | 482                | 0.14             | 0.66                | 0.03                | 0.25                | -6.66            | 2.89             | 0.09             | 0.2              | 74.9%              | <0.0001*              | <0.0001*      | NA                  |
| Ar-CONH-Ar                           | Amide       | 98                 | -0.42            | 1.3                 | 0.13                | -0.28               | -7.08            | 2.98             | -0.67            | -0.16            | 31.6%              | <0.0001*              | 0.002*        | NA                  |
| Alk-NH-Alk                           | Amine       | 1011               | 0.83             | 0.78                | 0.02                | 0.7                 | -4.18            | 5.22             | 0.78             | 0.87             | 95.0%              | <0.0001*              | <0.0001*      | NA                  |
| Ar-NH-Alk                            | Amine       | 571                | 0.78             | 0.69                | 0.03                | 0.75                | -4.97            | 5.88             | 0.72             | 0.84             | 94.7%              | <0.0001*              | <0.0001*      | NA                  |
| Ar-NH-Ar                             | Amine       | 158                | 0.54             | 0.51                | 0.04                | 0.55                | -1.23            | 3.62             | 0.46             | 0.62             | 90.5%              | <0.0001*              | <0.0001*      | NA                  |
| Arom-NH                              | Amine       | 810                | 0.6              | 0.54                | 0.02                | 0.6                 | -4.11            | 5.28             | 0.56             | 0.63             | 90.6%              | <0.0001*              | 0.002*        | NA                  |
| R-CONH-R                             | Carbamate   | 40                 | 0.58             | 0.52                | 0.08                | 0.58                | -1.23            | 1.82             | 0.42             | 0.74             | 95.0%              | 0.0003*               | <0.0001*      | NA                  |
| Alk-COOH                             | Acid        | 314                | 3.02             | 1.07                | 0.06                | 3.16                | -3.65            | 6.65             | 2.9              | 3.14             | 99.0%              | <0.0001*              | <0.0001*      | NA                  |
| Alk-OH                               | Alcohol     | 590                | 1.14             | 0.66                | 0.03                | 1.12                | -8.61            | 3.25             | 1.08             | 1.19             | 98.3%              | <0.0001*              | <0.0001*      | NA                  |
| Ar-COOH                              | Acid        | 475                | 3.36             | 0.97                | 0.04                | 3.49                | -0.11            | 6.33             | 3.26             | 3.43             | 99.6%              | <0.0001*              | <0.0001*      | NA                  |
| Ar-OH                                | Phenol      | 883                | 1.13             | 0.94                | 0.03                | 1.17                | -4.28            | 5.63             | 1.06             | 1.19             | 91.1%              | <0.0001*              | <0.0001*      | NA                  |
| Alk-SO2-NH2                          | Sulfonamide | 5                  | 0.28             | 0.45                | 0.2                 | 0.45                | -0.5             | 0.63             | -0.11            | 0.67             | 80.0%              | 0.0413*               | 0.2368        | NA                  |
| Alk-SO2-NH-Alk                       | Sulfonamide | 17                 | 0.68             | 0.24                | 0.06                | 0.65                | 0.33             | 1.13             | 0.56             | 0.79             | 100.0%             | 0.3354                | NA            | <0.0001*            |
| Alk-SO2-NH-Ar                        | Sulfonamide | 37                 | 0.83             | 0.86                | 0.14                | 0.6                 | -0.68            | 2.94             | 0.55             | 1.1              | 91.9%              | 0.0003*               | <0.0001*      | NA                  |
| Ar-SO2-NH2                           | Sulfonamide | 60                 | 0.67             | 0.19                | 0.02                | 0.67                | 0.21             | 1.43             | 0.62             | 0.72             | 100.0%             | 0.0010*               | <0.0001*      | NA                  |
| Ar-SO2-NH-Alk                        | Sulfonamide | 150                | 0.79             | 0.34                | 0.03                | 0.79                | -1.14            | 1.71             | 0.74             | 0.84             | 97.3%              | <0.0001*              | <0.0001*      | NA                  |
| Ar-SO2-NH-Ar                         | Sulfonamide | 60                 | 1.11             | 0.64                | 0.08                | 0.97                | -0.04            | 2.88             | 0.95             | 1.27             | 98.3%              | <0.0001*              | <0.0001*      | NA                  |
| Alk-NH-C(=O)-NH-Alk                  | Urea        | 17                 | 0.62             | 0.35                | 0.08                | 0.53                | 0.14             | 1.28             | 0.47             | 0.77             | 100.0%             | 0.2068                | NA            | <0.0001*            |
| Alk-NR-C(=O)-NH-Alk                  | Urea        | 55                 | 0.69             | 0.31                | 0.04                | 0.65                | 0.05             | 1.87             | 0.62             | 0.77             | 100.0%             | 0.0002*               | <0.0001*      | NA                  |
| Ar-NH-C(=O)-NH-Ar                    | Urea        | 8                  | 0.01             | 0.28                | 0.1                 | -0.01               | -0.31            | 0.46             | -0.19            | 0.2              | 50.0%              | 0.4199                | NA            | 0.8672              |
| Ar-NR-C(=O)-NH-Ar                    | Urea        | 5                  | -0.47            | 0.55                | 0.24                | -0.22               | -1.4             | -0.03            | -0.95            | 0.01             | 0.0%               | 0.0824                | NA            | 0.1273              |
| [N;!H0]!@[c,CX3]@[c,CX3]!@C=O        | Amide IMHB  | 12                 | -1.71            | 1.23                | 0.35                | -1.88               | -3.21            | 0.01             | -2.41            | -1.02            | 8.3%               | 0.1352                | NA            | 0.0010*             |
| [N;!H0]!@[c,CX3]!@[c,CX3]!@[c,CX3]=O | Amide IMHB  | 4                  | -5.05            | 3.01                | 1.5                 | -6.26               | -7.08            | -0.61            | -8               | -2.11            | 0.0%               | 0.0637                | NA            | 0.125               |
| [N;!H0]!@C!@c[n;X2]                  | Amide IMHB  | 97                 | -0.27            | 0.63                | 0.06                | -0.22               | -2.53            | 2.08             | -0.42            | -0.16            | 37.9%              | 0.0006*               | <0.0001*      | NA                  |
| Occc(=O)[NH1][c,C]                   | Amide IMHB  | 43                 | -0.49            | 0.85                | 0.13                | -0.25               | -2.45            | 1.43             | -0.74            | -0.23            | 37.2%              | 0.0541                | NA            | 0.0019*             |
| [NH1]!@[C;X3]!@ccF                   | Amide IMHB  | 9                  | 0.12             | 0.17                | 0.06                | 0.15                | -0.25            | 0.36             | 0.01             | 0.23             | 88.9%              | 0.0853                | NA            | 0.0898              |
| [c,C;X3]!@[NH1]!@ccF                 | Amide IMHB  | 2                  | 0.38             | 0.05                | 0.04                | 0.38                | 0.34             | 0.41             | 0.31             | 0.44             | 100.0%             | 1                     | NA            | 0.5                 |
| No IMHBs                             | Amide IMHB  | 618                | 0.22             | 0.51                | 0.02                | 0.28                | -2.13            | 2.98             | 0.18             | 0.26             | 77.7%              | <0.0001*              | <0.0001*      | NA                  |
| Cyclic amides                        | Amide       | 167                | 0.71             | 0.48                | 0.04                | 0.75                | -4.57            | 1.77             | 0.64             | 0.78             | 98.2%              | <0.0001*              | 0.0287*       | NA                  |
| Acyclic amides                       | Amide       | 717                | 0.07             | 0.79                | 0.03                | 0.2                 | -7.08            | 2.98             | 0.01             | 0.12             | 68.5%              | <0.0001*              | <0.0001*      | NA                  |

## R<sup>2</sup> correlation coefficients between $\Delta\text{Log Sol}$ and $\Delta\text{Log D}$ for each *N*-methylation structural class

| Methylation type                     | R2 Correlation between<br>$\Delta\text{Log Sol}$ and $\Delta\text{Log D}$ |
|--------------------------------------|---------------------------------------------------------------------------|
| Ar-SO <sub>2</sub> -NH-Ar            | 0.284                                                                     |
| Ar-CONH-Ar                           | 0.148                                                                     |
| Ar-COOH                              | 0.142                                                                     |
| Alk-SO <sub>2</sub> -NH <sub>2</sub> | 0.123                                                                     |
| Alk-COOH                             | 0.102                                                                     |
| Ar-OH                                | 0.102                                                                     |
| Ar-SO <sub>2</sub> -NH-Alk           | 0.047                                                                     |
| Arom-NH                              | 0.045                                                                     |
| Alk-NH-Alk                           | 0.044                                                                     |
| Ar-NH-Alk                            | 0.044                                                                     |
| Alk-CONH <sub>2</sub>                | 0.037                                                                     |
| Alk-CONH-Ar                          | 0.032                                                                     |
| Ar-CONH-Alk                          | 0.023                                                                     |
| Alk-SO <sub>2</sub> -NH-Ar           | 0.021                                                                     |
| Ar-NH-C(=O)-NH-Ar                    | 0.019                                                                     |
| Ar-NH-Ar                             | 0.016                                                                     |
| Alk-CONH-Alk                         | 0.008                                                                     |
| R-OCNH-R                             | 0.007                                                                     |
| Ar-NR-C(=O)-NH-Ar                    | 0.007                                                                     |
| Alk-OH                               | 0.006                                                                     |
| Alk-NH-C(=O)-NH-Alk                  | 0.006                                                                     |
| Alk-SO <sub>2</sub> -NH-Alk          | 0.003                                                                     |
| Ar-SO <sub>2</sub> -NH <sub>2</sub>  | 0.002                                                                     |
| Ar-CONH <sub>2</sub>                 | 0.000                                                                     |
| Alk-NR-C(=O)-NH-Alk                  | 0.000                                                                     |

# Influence of $pK_a$ of aliphatic amine (Alk-NH-Alk) on change of $\log D$ upon *O*-methylation

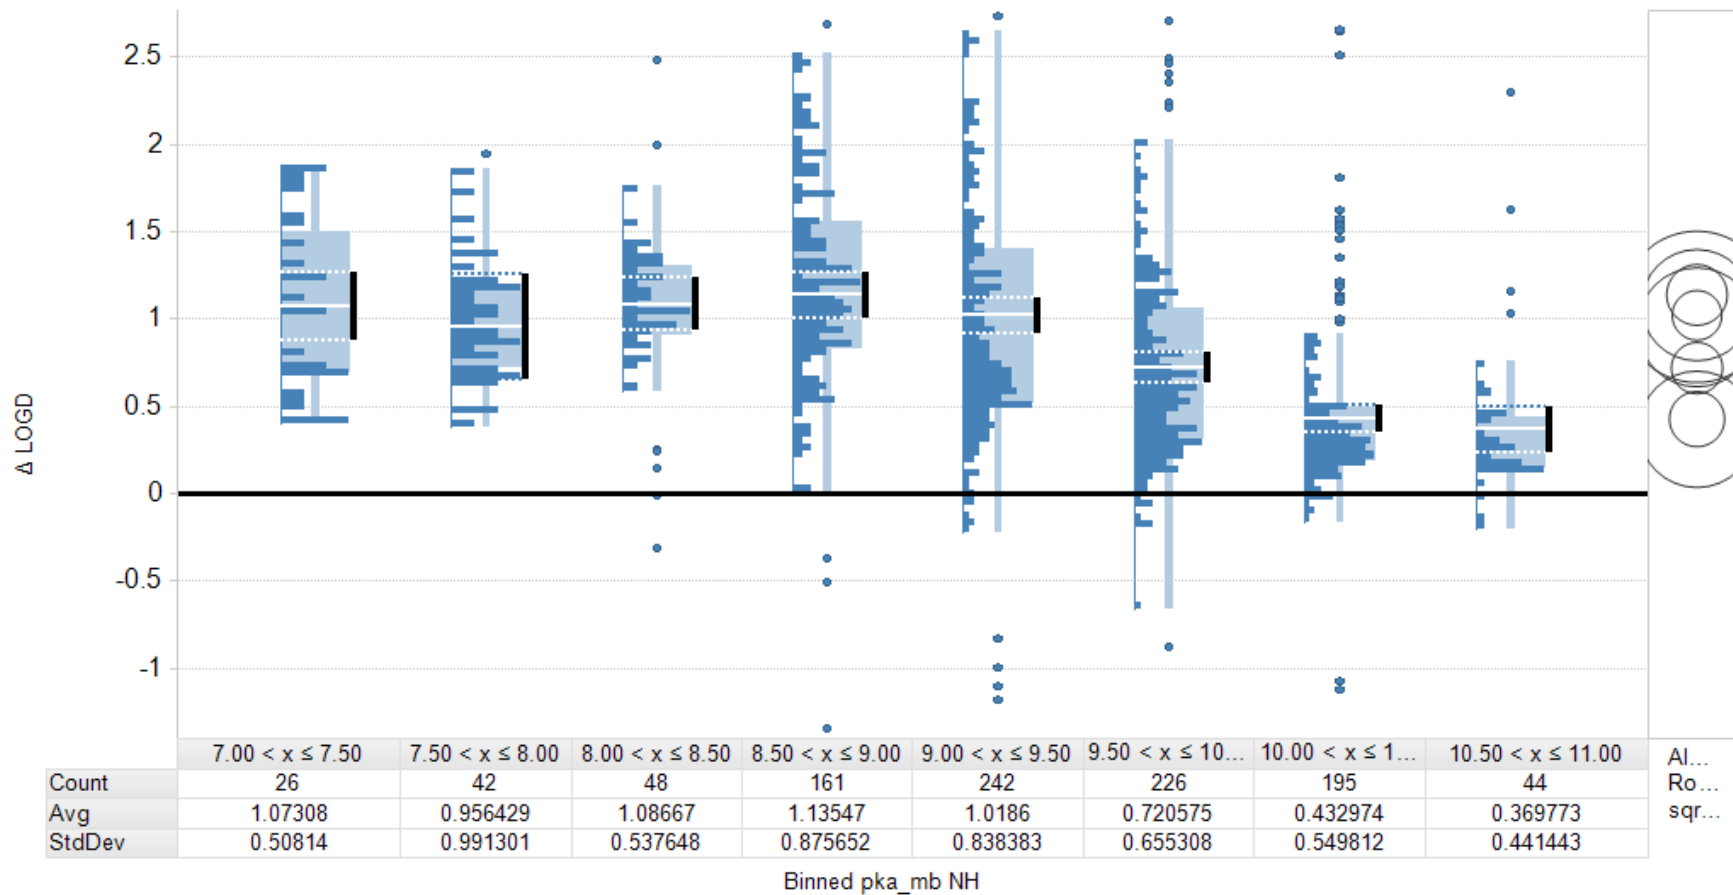

# Influence of log *D* of aliphatic acid on change in solubility upon *O*-methylation

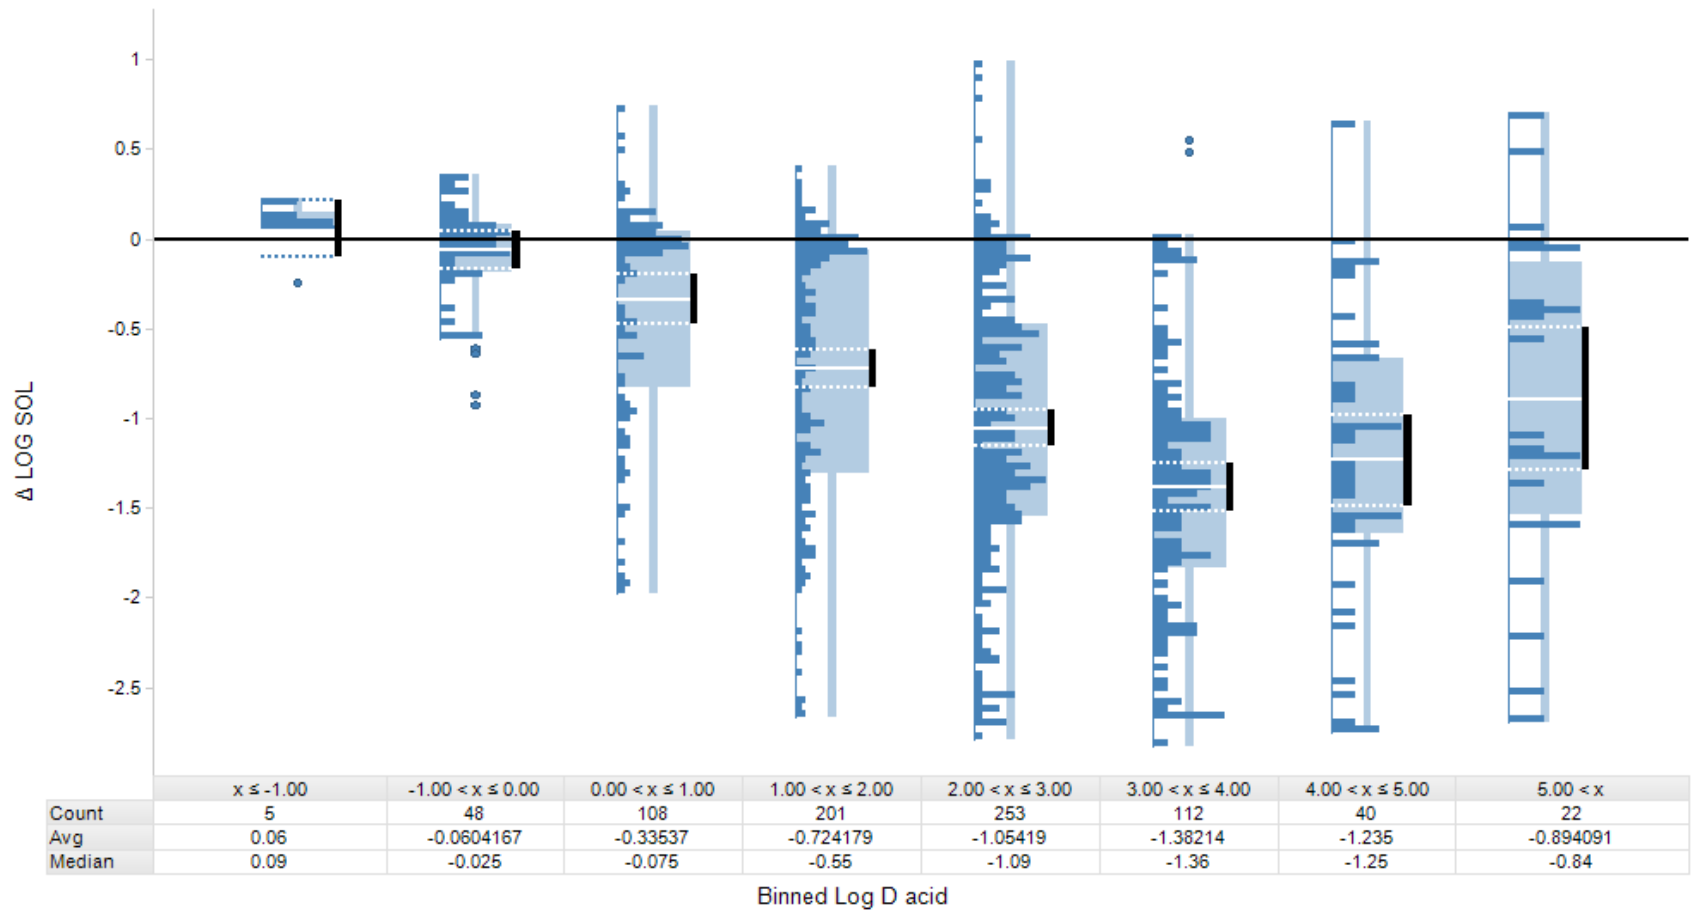

Supplement: c5md00309a1.pdf [file c5md00309a1.pdf]
